# Supplementary material for: Phosphorescent sensing of Cr3+ with protein-functionalized Mn-doped ZnS quantum dots
Source: Royal Society of Chemistry journal article supplement (doi:10.1039/c3an01213a), 2013-01-01
Supplement: c3an01213a.pdf [file c3an01213a.pdf]

## Supplementary Data

### **Phosphorescent sensing of Cr<sup>3+</sup> with protein-functionalized Mn-doped ZnS quantum dots**

Ting Zhao,<sup>1</sup> Xiandeng Hou,<sup>1, 2</sup> Ya-Ni Xie,<sup>2</sup> Lan Wu,<sup>2\*</sup> Peng Wu<sup>2\*</sup>

<sup>1</sup>College of Chemistry, <sup>2</sup>Analytical & Testing Center, Sichuan University,

Chengdu, 610064, China

\*Corresponding author, E-mail: wupeng@scu.edu.cn, wulan@scu.edu.cn

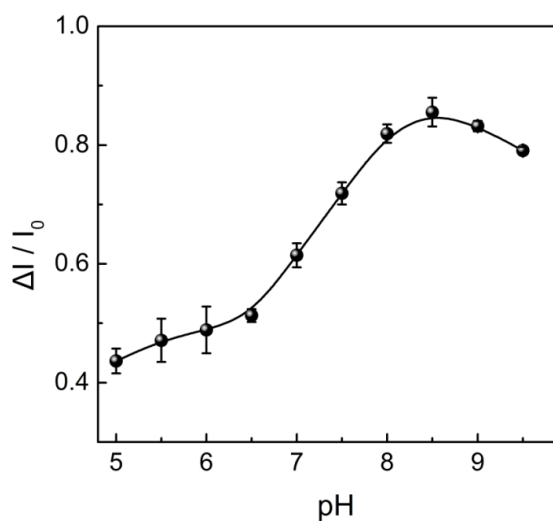

**Figure S1** Sample pH-dependent phosphorescence quenching of the dBSA-capped Mn-ZnS QDs by  $\text{Cr}^{3+}$  ( $0.3 \mu\text{M}$ ).

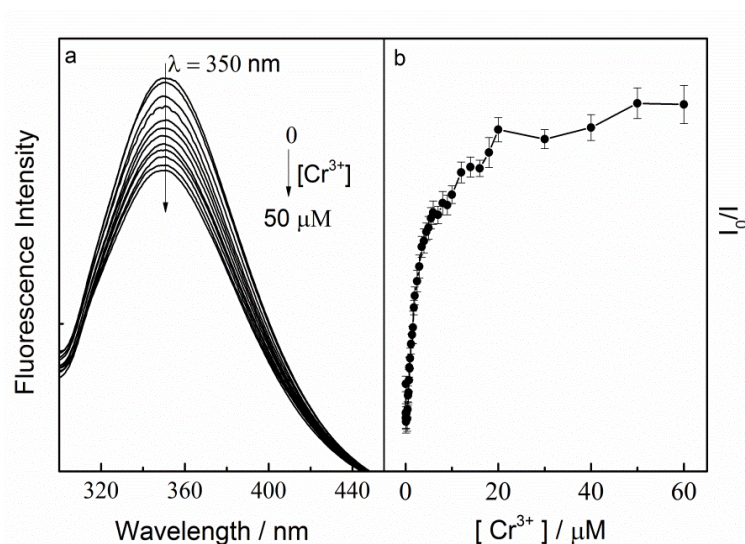

**Figure S2** The intrinsic fluorescence of dBSA ( $\lambda_{\text{ex}} = 290 \text{ nm}$ ) was quenched by  $\text{Cr}^{3+}$ . (a) fluorescence spectra; and (b) variation of the fluorescence intensity *versus* the concentration of  $\text{Cr}^{3+}$ .

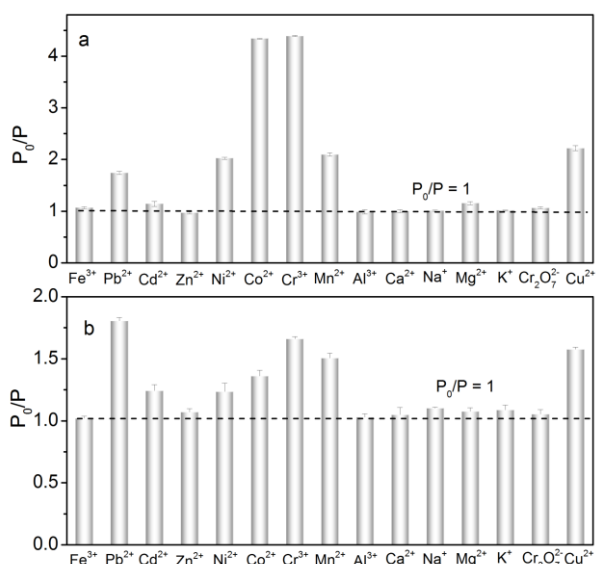

**Figure S3** Phosphorescent responses of the uncapped (a, 5 mg/L) and MPA-capped (b, 20 mg/L) Mn-doped ZnS QDs for metal ions. (where the  $P_0$  is the initial phosphorescence intensity of the Mn-doped ZnS QDs in the absence metal ions,  $P$  is the phosphorescence intensity in the presence metal ions.  $0.3 \mu\text{M}$  each for  $Cr^{3+}$ ,  $Fe^{3+}$ ,  $Pb^{2+}$ ,  $Cd^{2+}$ ,  $Zn^{2+}$ ,  $Ni^{2+}$ ,  $Co^{2+}$ ,  $Mn^{2+}$  and  $Cr_2O_7^{2-}$ , 10 mM each for  $Al^{3+}$ ,  $Ca^{2+}$ ,  $Na^+$ ,  $Mg^{2+}$  and  $K^+$ ).

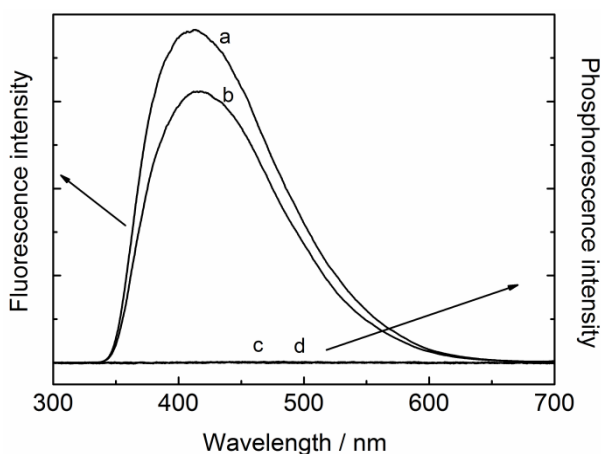

**Figure S4** Fluorescence and phosphorescence background of the water samples. (a) and (b), fluorescence background of the tap water and river samples; and (c) and (d), phosphorescence background of the tap water and river samples.

Calculation of the VB and CB of Mn-doped ZnS QDs

The HOMO/LUMO energy levels of the QDs are calculated using the equation:<sup>1</sup>

$$E_{HOMO} = -e(E_{ox}^{onset} + 4.4) \text{ (eV)}$$

$$E_{LUMO} = -e(E_{red}^{onset} + 4.4) \text{ (eV)}$$

## References

- 1 Y. C. Li, J. Wen, J. J. Liu, F. Jiang and Y. F. Li, *Prog. Chem.*, 2011, 23, 2215-2224.
